# Supplementary material
Source: Springer Nature journal article supplement (https://www.springermedizin.de/resource/supplementary/12889_2011_4087_MOESM1_ESM.pdf/9491546)

**Zsbp**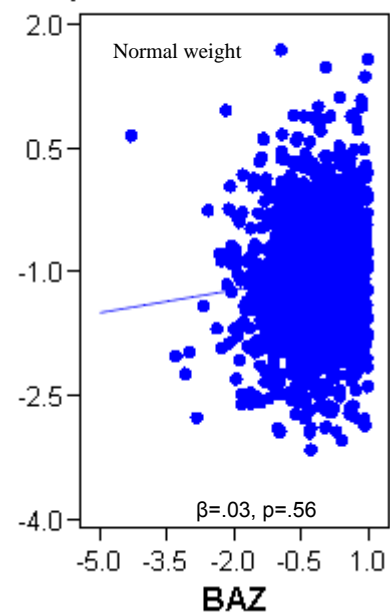**Zsbp**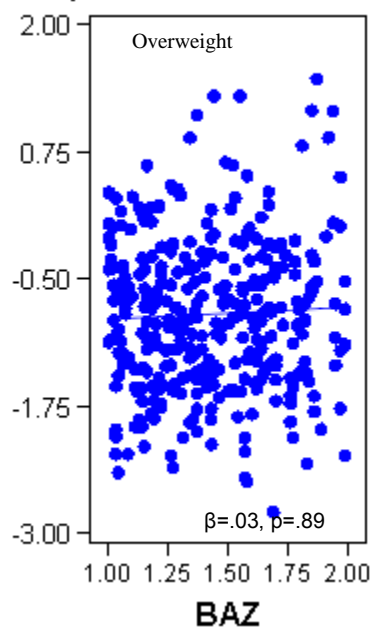**Zsbp**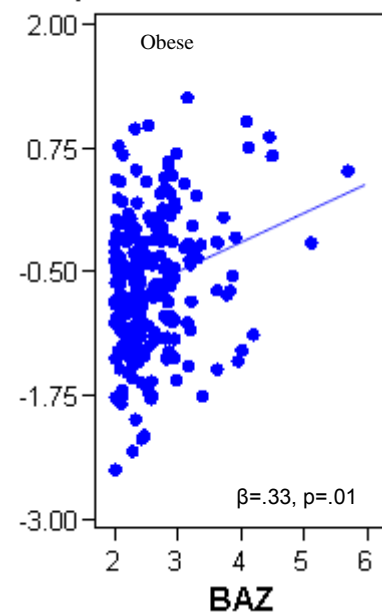**Zdbp**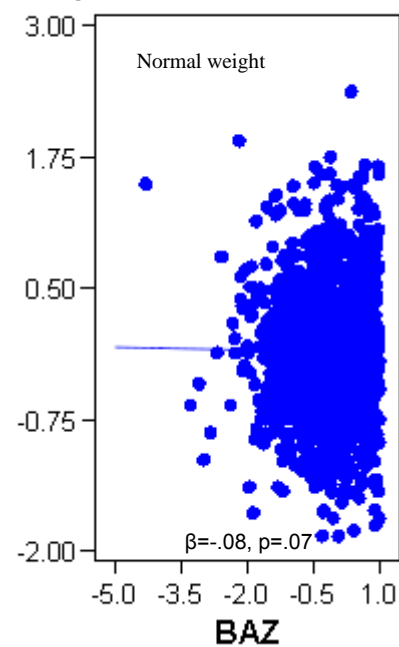**Zdbp**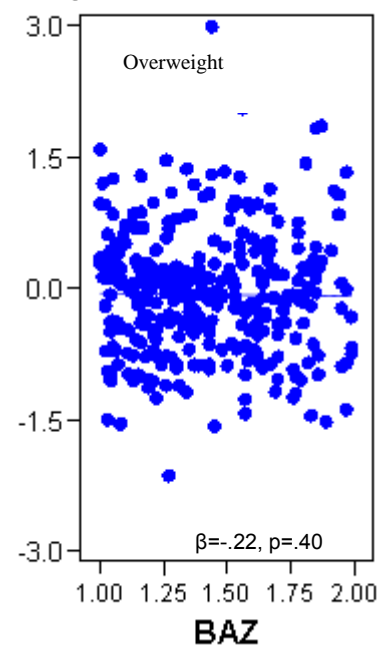**Zdbp**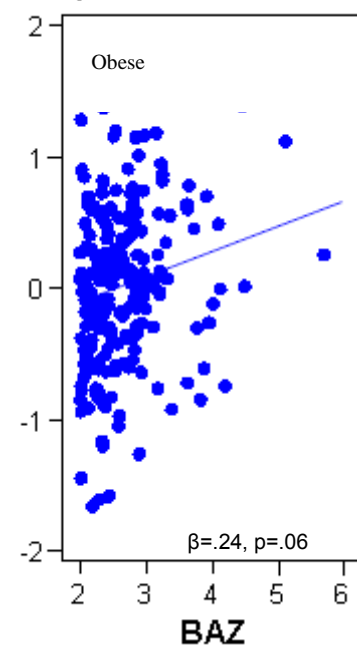

Supplement: MOESM1 [file 9491546]
